# Supplementary material for: Physicochemical Compatibility and Stability of Linezolid with Parenteral Nutrition
Source: PubMed Central journal article supplement (PMC6480230; doi:10.3390/molecules24071242), 2019-03-29
Supplement: molecules-24-01242-s001.pdf [file molecules-24-01242-s001.pdf]

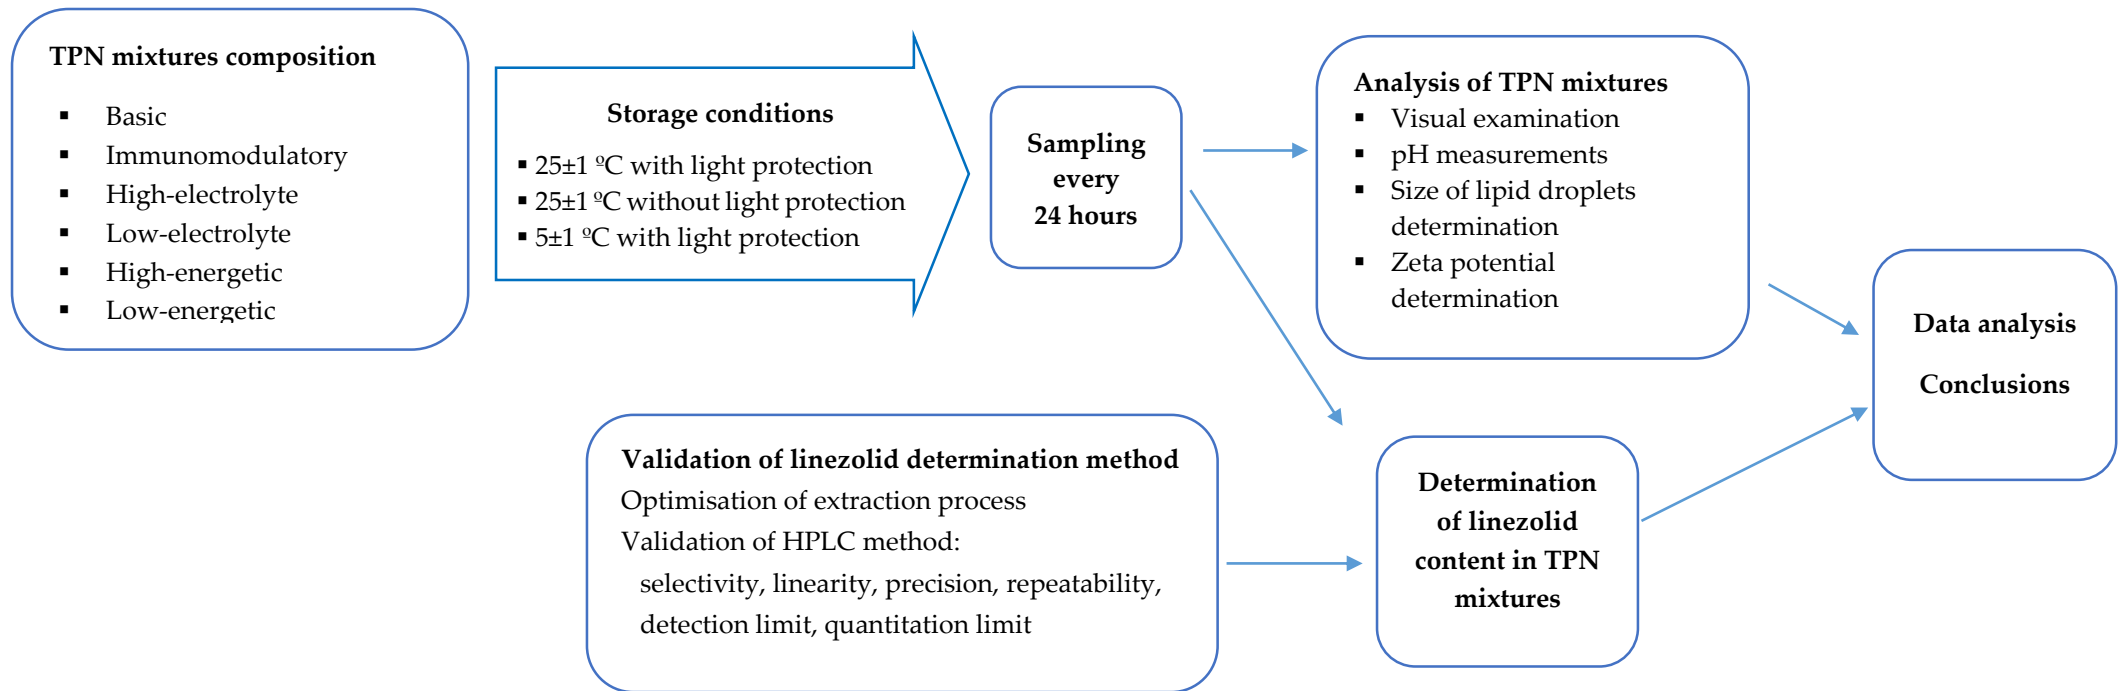

Scheme 1. Diagram of study design (TPN – total parenteral nutrition; HPLC – high-performance liquid chromatography)
